# Supplementary material for: Psychological Aspects and Eating Habits during COVID-19 Home Confinement: Results of EHLC-COVID-19 Italian Online Survey
Source: MDPI journal article supplement (doi:10.3390/nu12072152), 2020-07-19
Supplement: s1 [file s1]

**Table S1.** Univariable binary logistic regression between respondents' characteristics and control over feeding.

|                                             | Coefficient<br>(B) | 95% CI <sup>a</sup> |                | <i>p</i> <sup>a</sup> | OR    |
|---------------------------------------------|--------------------|---------------------|----------------|-----------------------|-------|
|                                             |                    | Lower<br>Bound      | Upper<br>Bound |                       |       |
| Age                                         | -0.029             | 0.952               | 0.991          | <b>0.005</b>          | 0.971 |
| BMI                                         | -0.127             | 0.827               | 0.938          | <b>&lt;0.001</b>      | 0.881 |
| Gender (ref. Males)                         | -0.102             | 0.514               | 1.589          | 0.724                 | 0.903 |
| Depressed mood                              | -1.048             | 0.218               | 0.563          | <b>&lt;0.000</b>      | 0.350 |
| Anxious feelings                            | -1.090             | 0.210               | 0.538          | <b>&lt;0.000</b>      | 0.336 |
| Hypochondria                                | -0.044             | 0.602               | 1.520          | 0.852                 | 0.957 |
| Dieting before COVID-19                     | 0.447              | 0.984               | 2.483          | 0.059                 | 1.563 |
| Need to increase food intake to feel better | -1.234             | 0.177               | 0.480          | <b>&lt;0.000</b>      | 0.291 |
| Insomnia                                    | -0.267             | 0.482               | 1.216          | 0.258                 | 0.766 |

Univariable logistic regressions between control over feeding (dependent variable) and respondents characteristics (independent co-variables. Statistical significance for  $p < 0.05$  (in bold). BMI, Body Mass Index; OR, Odd Ratio.
